# Supplementary material for: Polyaniline nanotubes with rectangular-hollow-core and its self-assembled surface decoration: high conductivity and dielectric properties
Source: Royal Society of Chemistry journal article supplement (doi:10.1039/c3ra47155a), 2014-01-01
Supplement: c3ra47155a.pdf [file c3ra47155a.pdf]

## Supporting File:

# Polyaniline Nanotubes with Rectangular-Hollow-Core and its Self-assembled Surface Decoration: high conductivity and dielectric properties

Ramesh Manda, Chandar Amgoth, Santhosh Kumar, Pradip Paik,\*

School of Engineering Sciences and Technology, University of Hyderabad, Hyderabad 500 046, India.  
Fax: XX XXXX XXXX; Tel: +91-40-2313 4457; E-mail: [ppse@uohyd.ernet.in](mailto:ppse@uohyd.ernet.in), [paik@uohyd.ac.in](mailto:paik@uohyd.ac.in), [pradip.paik@gmail.com](mailto:pradip.paik@gmail.com)

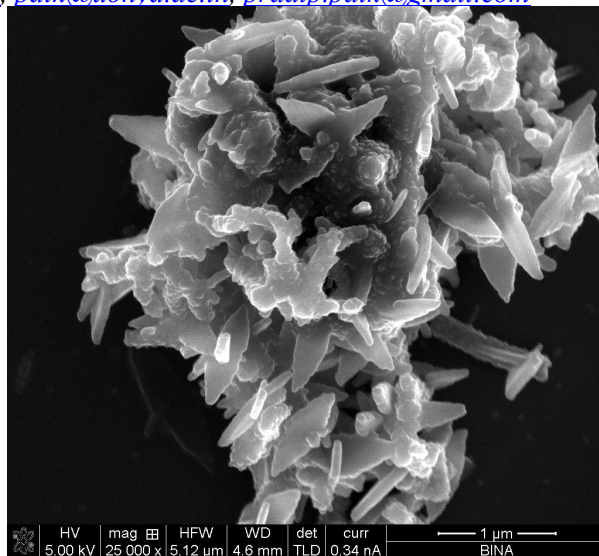

Fig. S1 PANI flakes formed when the molar ratios of [aniline] and [HCl], and [ASP] and [aniline] were kept 1:1 and 1:2, respectively (Batch-1)

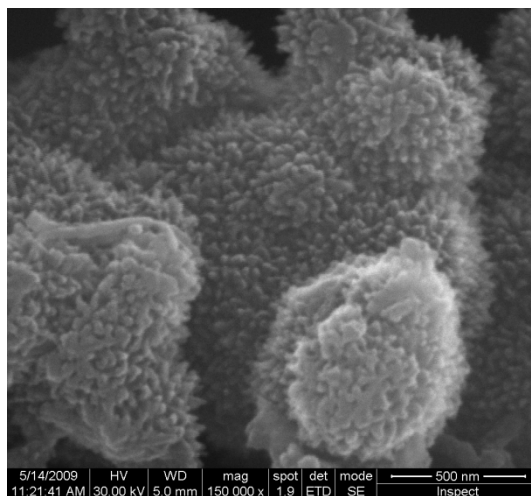

Fig. S2 PANIO synthesized in H<sup>+</sup> only

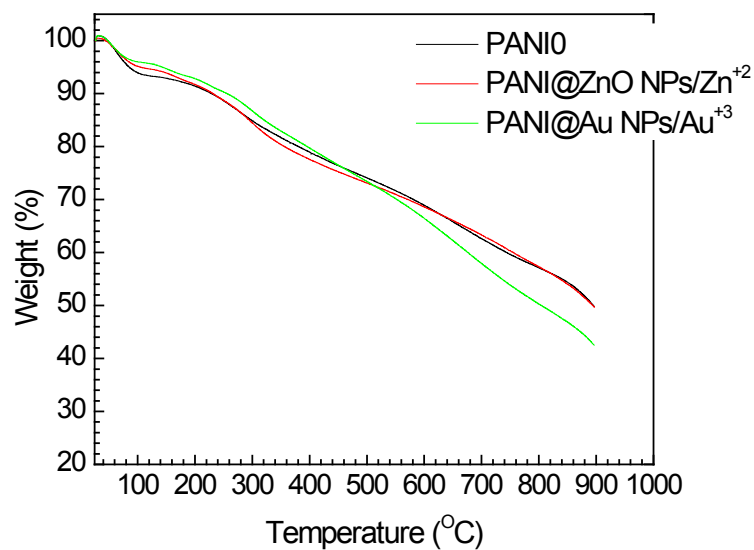

Fig S3: TGA of PANI0, PANI@Au NPs/Au<sup>+3</sup> and PANI@ZnO NPs/Zn<sup>+2</sup>

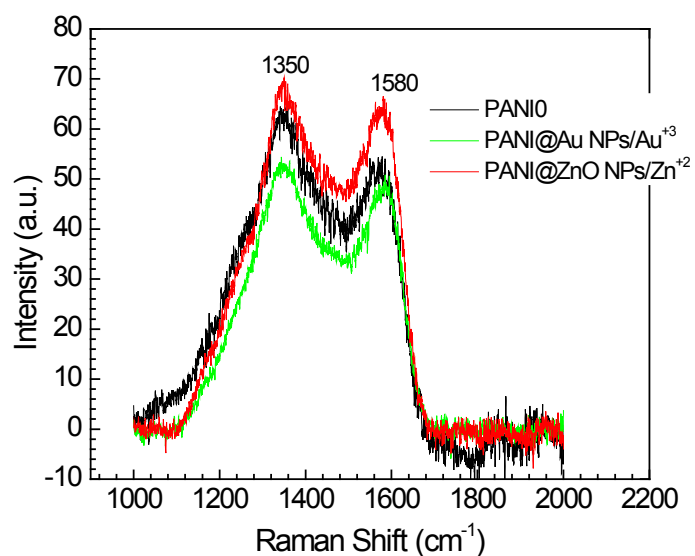

Fig. S4: Raman spectra for PANI0, PANI@AuNPs/Au<sup>+3</sup> and PANI@ZnO-NPs/Zn<sup>+2</sup> indicating the conduction band present

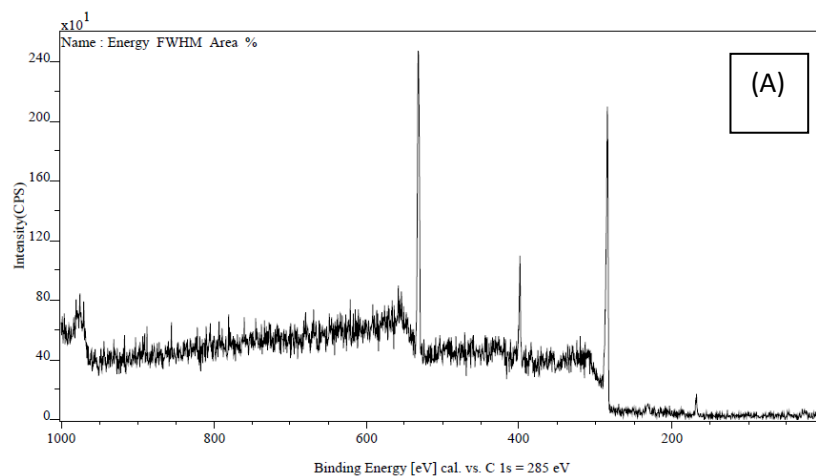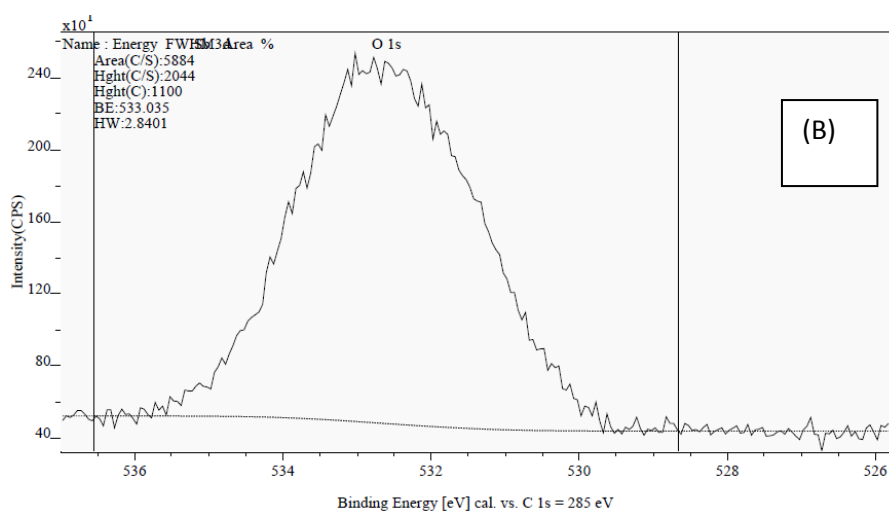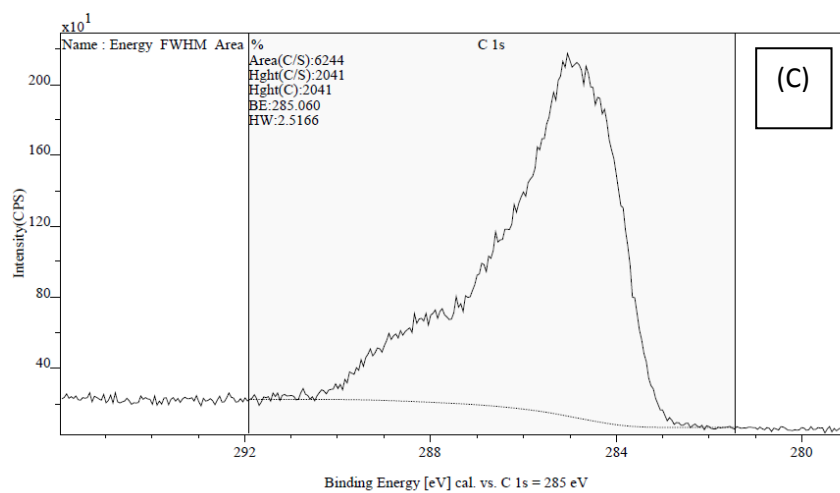

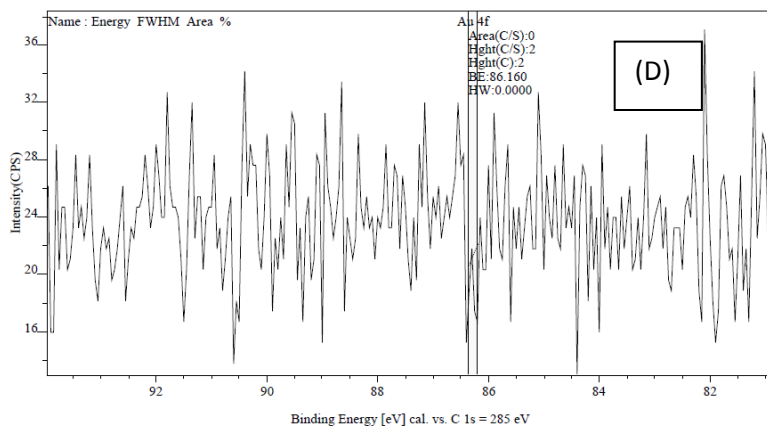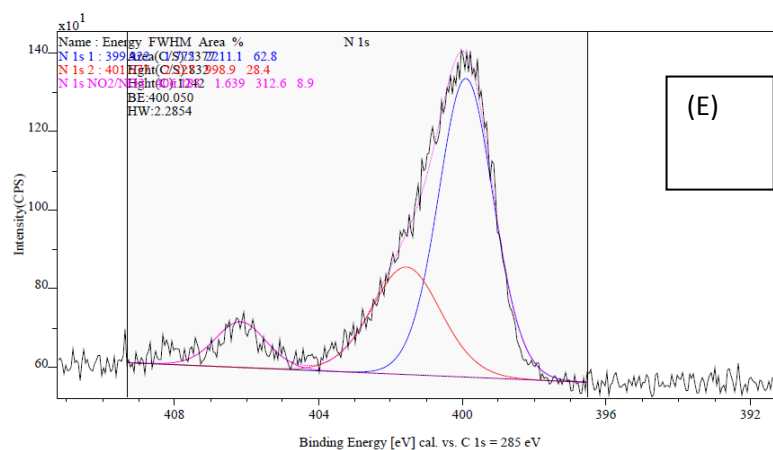

Fig. S5 X-ray photoluminescence spectroscopy for PANI@AuNPs/Au<sup>+3</sup>, (A) full range scan, (B) scan range for oxygen (1s), (C) scan range for carbon (1s), (D) scan range for gold (4f) and (E) scan range for nitrogen (1s)

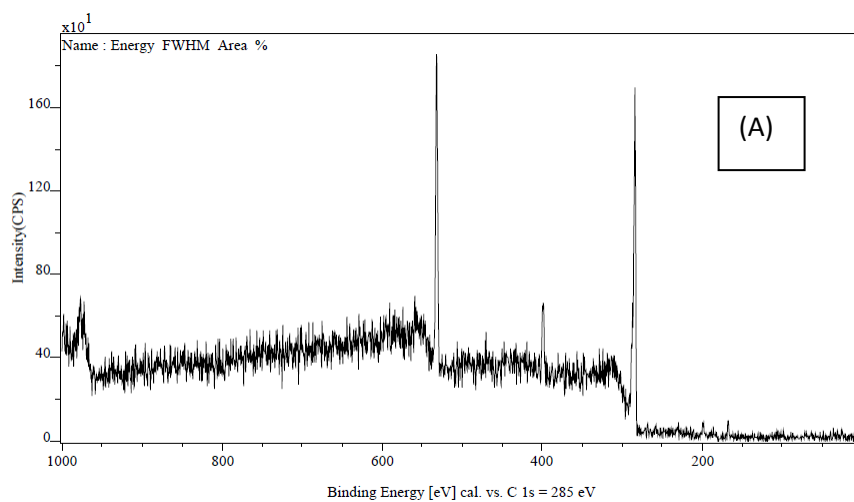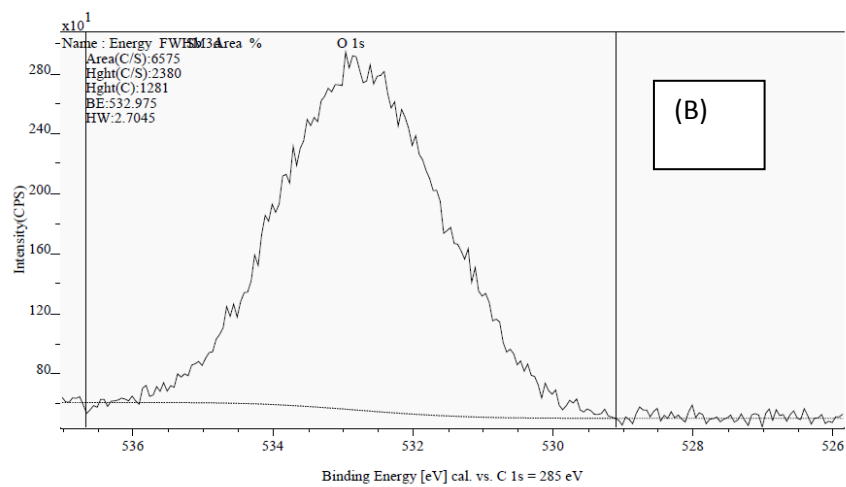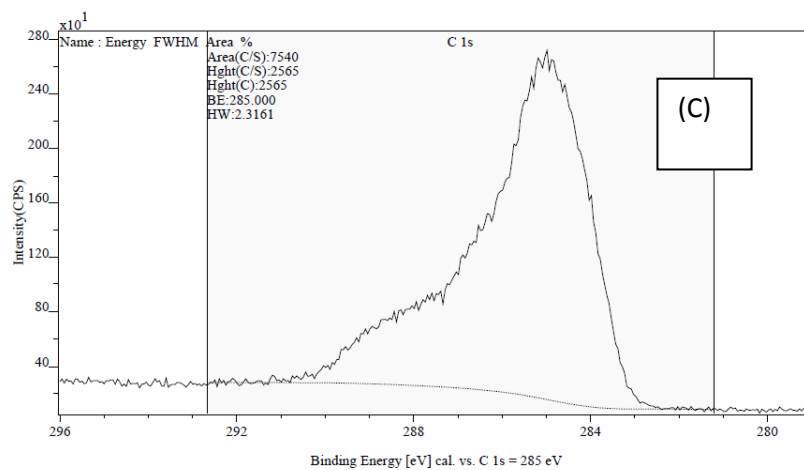

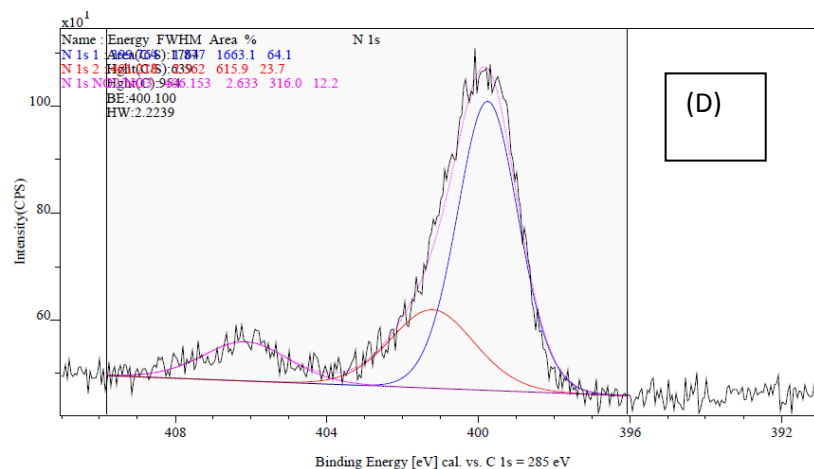

Fig. S6 X-ray photoluminescence spectroscopy for PANI@AuNPs/Au<sup>+3</sup>, (A) full range scan, (B) scan range for oxygen (1s), (C) scan range for carbon (1s), (D) scan range for nitrogen (1s)

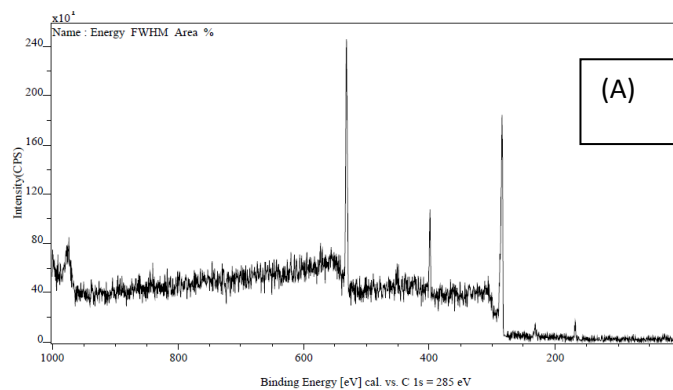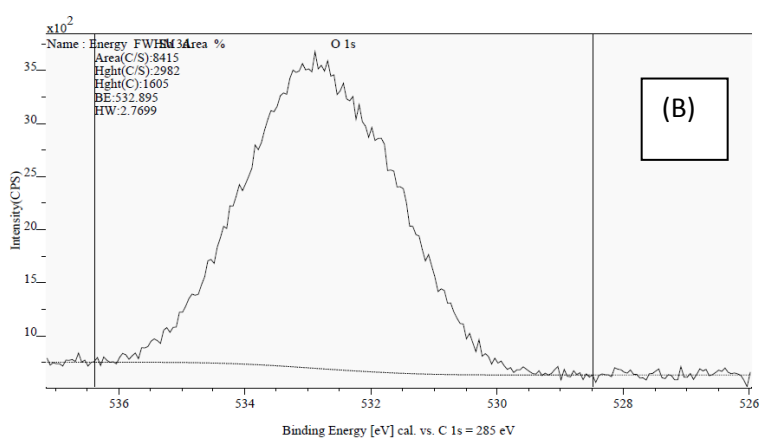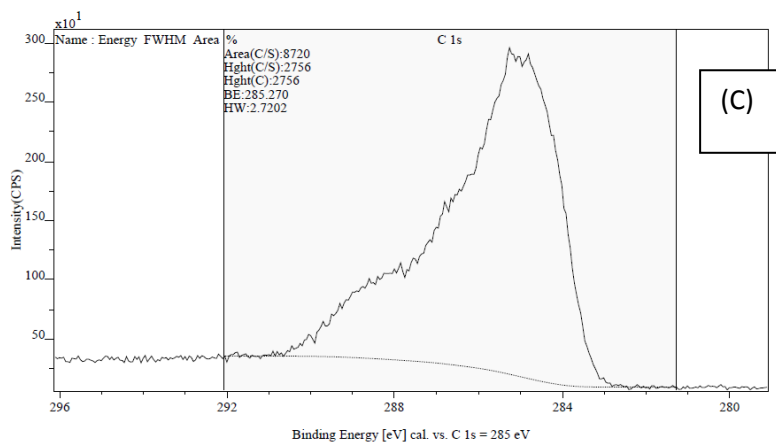

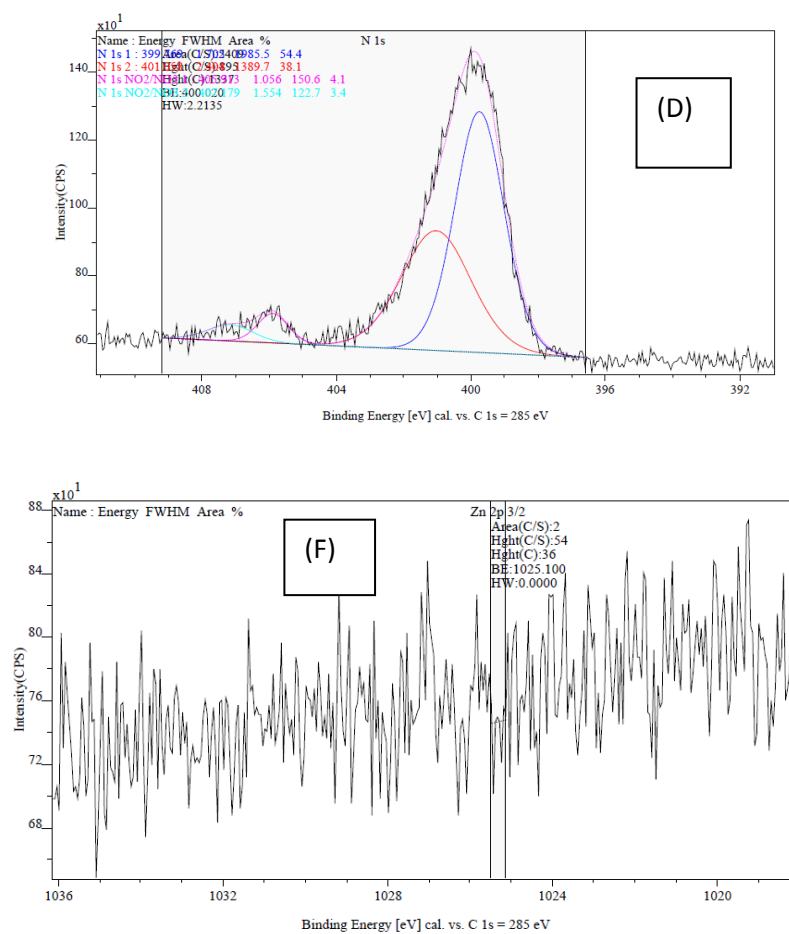

Fig. S7 X-ray photoelectron spectroscopy for PANI@ZnO NPs/Zn<sup>+2</sup>, (A) full range scan, (B) scan range for oxygen (1s), (C) scan range for carbon (1s), (D) scan range for nitrogen (1s) and (E) scan range for Zn (2p<sup>3/2</sup>)



**Table S1.** XPS results for PANIO

| Peaks | Position BE (eV) | FWHM (eV) | Raw Area (CPS) | RSF Mass | Atomic Conc % | Atomic Conc% | Mass  |
|-------|------------------|-----------|----------------|----------|---------------|--------------|-------|
| N 1s  | 400.100          | 2.224     | 1764.2         | 0.477    | 14.007        | 9.31         | 10.01 |
| O 1s  | 532.975          | 2.704     | 6574.7         | 0.780    | 15.999        | 20.83        | 25.58 |
| C 1s  | 285.000          | 2.316     | 7539.8         | 0.278    | 12.011        | 69.87        | 64.41 |

**Table S2.** XPS results for PANI@AuNPs/Au<sup>+3</sup>

| Peaks | Position BE (eV) | FWHM (eV) | Raw Area (CPS) | RSF Mass | Atomic Conc % | Atomic Conc% | Mass  |
|-------|------------------|-----------|----------------|----------|---------------|--------------|-------|
| N 1s  | 399.860          | 2.191     | 1619.1         | 0.477    | 14.007        | 10.05        | 10.75 |
| O 1s  | 533.035          | 2.840     | 5884.3         | 0.780    | 15.999        | 21.92        | 26.80 |
| C 1s  | 285.060          | 2.517     | 6243.6         | 0.278    | 12.011        | 68.03        | 62.45 |
| Au 4f | 86.160           | 0.000     | 0.0            | 6.250    | 196.967       | 0.00         | 0.00  |

**Table S3.** XPS results for PANI@ZnO NPs/Zn<sup>+2</sup>

| Peaks     | Position BE (eV) | FWHM (eV) | Raw Area (CPS) | RSF Mass | Atomic Conc (%) | Atomic Conc % | Mass  |
|-----------|------------------|-----------|----------------|----------|-----------------|---------------|-------|
| Zn 2p 3/2 | 1025.100         | 0.000     | 2.2            | 3.730    | 65.387          | 0.00          | 0.00  |
| N 1s      | 400.020          | 2.214     | 2409.4         | 0.477    | 14.007          | 10.58         | 11.31 |
| O 1s      | 532.895          | 2.770     | 8415.3         | 0.780    | 15.999          | 22.18         | 27.08 |
| C 1s      | 285.270          | 2.720     | 8720.1         | 0.278    | 12.011          | 67.24         | 61.61 |
